# Supplementary material
Source: PubMed Central journal article supplement (PMC5617335)
Supplement: NIHMS907863-supplement-Supplemental_Table_1.pdf [file NIHMS907863-supplement-Supplemental_Table_1.pdf]

## Supplemental note: grouped membership list of the six initiatives

### Nuclear Organization and Function Interdisciplinary Consortium (NOFIC)

Andrew Belmont<sup>1</sup>, Bing Ren<sup>2</sup>, Frank Alber<sup>3</sup>, Jay Shendure<sup>4, 5</sup>, Job Dekker<sup>6</sup>, Cornelis Murre<sup>7</sup>, Leonid Mirny<sup>8</sup>, Lin Chen<sup>3</sup>, William Noble<sup>4</sup>, Yijun Ruan<sup>9</sup>, Aafke van den Berg<sup>8</sup>, Alec Basil Heckert<sup>10</sup>, Alessandro Bertero<sup>11</sup>, Alex Bortnick<sup>7</sup>, Alexander Kukalev<sup>12</sup>, Amanda Moore<sup>7</sup>, Ana Pombo<sup>12</sup>, Anders Sejr Hansen<sup>10</sup>, Andrea Chiariello<sup>13</sup>, Andrej Sali<sup>14</sup>, Andrew Stephens<sup>15</sup>, Ankita Nand<sup>6</sup>, Anne-Laure Valton<sup>6</sup>, Anton Goloborodko<sup>8</sup>, Arthur He<sup>7</sup>, Bas van Steensel<sup>16</sup>, Ben Webb<sup>14</sup>, Benjamin Roscoe<sup>6</sup>, Bin Li<sup>17</sup>, Brian Chait<sup>18</sup>, C. Anthony Blau<sup>19</sup>, Carlo Annunziatella<sup>13</sup>, Carol Ware<sup>20</sup>, Chia Lin Wei<sup>21</sup>, Christ Leemans<sup>16</sup>, Christine Disteché<sup>11</sup>, Christine Jarjour<sup>3</sup>, Christoph Thieme<sup>12</sup>, Chuck Murry<sup>11</sup>, Claudia Trevilla Barcia<sup>22</sup>, Cole Trapnell<sup>4</sup>, Daan Peric-Hupkes<sup>16</sup>, Dan Simon<sup>23</sup>, Daniel Bartlett<sup>22</sup>, Daniel Gao<sup>24</sup>, Dariusz Plewczynski<sup>25</sup>, David Gilbert<sup>22</sup>, David Gorkin<sup>17</sup>, David McSwiggen<sup>10</sup>, Dejun Lin<sup>4</sup>, Delasa Aghamirzaie<sup>4</sup>, Ed Banigan<sup>15</sup>, Elizabeth Finn<sup>26</sup>, Erik Sontheimer<sup>24</sup>, Filipe Tavares Cadete<sup>6</sup>, Fred Mast<sup>27</sup>, Gala Filippova<sup>11</sup>, Galip Gürkan Yardımcı<sup>4</sup>, Geoffrey Fudenberg<sup>8</sup>, Gesa Loof<sup>12</sup>, Giancarlo Bonora<sup>4</sup>, Gianluca Pegoraro<sup>28</sup>, Giulia Caglio<sup>12</sup>, Guido Polles<sup>3</sup>, Hakan Ozadam<sup>6</sup>, Hanjun Shin<sup>3</sup>, Hannah Pliner<sup>4</sup>, Hans Reinecke<sup>11</sup>, Haochen Li<sup>3</sup>, Harianto Tjong<sup>3</sup>, He Fang<sup>11</sup>, Hervé Marie-Nelly<sup>10</sup>, Houda Belaghzal<sup>6</sup>, Hugo Brandão<sup>8</sup>, Huimin Zhao<sup>29</sup>, Ibrahim Cissé<sup>30</sup>, Inkyung Jung<sup>17</sup>, Ipek Tasan<sup>29</sup>, Ivan Juric<sup>31</sup>, J. Owen Andrews<sup>30</sup>, Jacob Schreiber<sup>32</sup>, Jan-Hendrik Spille<sup>30</sup>, Jared Zimmerman<sup>22</sup>, Jesse Dixon<sup>33</sup>, Jian Ma<sup>34</sup>, Jiang Xu<sup>3</sup>, Jiao Sima<sup>22</sup>, Johan Gibcus<sup>6</sup>, Johannes Nuebler<sup>8</sup>, John Aitchison<sup>27</sup>, John Marko<sup>15</sup>, Jonathan Lam<sup>17</sup>, Jorge A. Bardales Mendieta<sup>10</sup>, Juan Carlos Rivera Mulia<sup>22</sup>, Justin Cayford<sup>3</sup>, Kate Cook<sup>4</sup>, Katie Mitzelfelt<sup>11</sup>, Krishna Mohan Parsi<sup>35</sup>, Kyle Klein<sup>22</sup>, Laura Brueckner<sup>16</sup>, Liguozhang<sup>1</sup>, Lil Pabon<sup>11</sup>, Lindsay Carpp<sup>27</sup>, Liyan Yang<sup>6</sup>, Long Pei<sup>3</sup>, Maike Sander<sup>36</sup>, Maksim Imakaev<sup>8</sup>, Mario Nicodemi<sup>13</sup>, Markus Schueler<sup>12</sup>, Martin Falk<sup>8</sup>, Matt Denholtz<sup>7</sup>, Maxwell Libbrecht<sup>4</sup>, Mehmet Fatih Bolukbasi<sup>6</sup>, Meizhen Zhen<sup>9</sup>, Miao Yu<sup>17</sup>, Michael Rout<sup>23</sup>, Ming Hu<sup>31</sup>, Mustafa Mir<sup>10</sup>, Nadia Armani<sup>24</sup>, Nan Hua<sup>3</sup>, Naoki Kubo<sup>17</sup>, Nezar Abdennur<sup>8</sup>, Nils Krietenstein<sup>6</sup>, Nimish Khanna<sup>7</sup>, Olga Dudko<sup>37</sup>, Oliver Rando<sup>6</sup>, Oscar Luo<sup>9</sup>, Pankaj Chaturvedi<sup>1</sup>, Paul Blainey<sup>38</sup>, Paul Fields<sup>11</sup>, Ping Wang<sup>9</sup>, Qingjiao Li<sup>3</sup>, Rafael Casellas<sup>39</sup>, Reddy Gudla<sup>26</sup>, Rene Maehr<sup>35</sup>, Rieke Kempfer<sup>12</sup>, Robert Beagrie<sup>12</sup>, Ronald Biggs<sup>15</sup>, Rongxing Fang<sup>17</sup>, Ruolan Qiu<sup>4</sup>, Ryan Michael Jude Genga<sup>35</sup>, Sanjay Srivatsan<sup>4</sup>, Sanjeev Kumar<sup>27</sup>, Scot Wolfe<sup>6</sup>, Scott Shaffer<sup>6</sup>, Seungsoo Kim<sup>4</sup>, Sigal Shachar<sup>26</sup>, Simona Bianco<sup>13</sup>, Surbhi Jain<sup>29</sup>, Takayo Sasaki<sup>22</sup>, Takeshi Isoda<sup>7</sup>, Tom Misteli<sup>26</sup>, Tom van Schaik<sup>16</sup>, Tristin Liu<sup>17</sup>, Tsung-han Hsieh<sup>6</sup>, Vijay Ramani<sup>4</sup>, Vikram Agarwal<sup>4</sup>, Vishnu Dileep<sup>22</sup>, Vivek Chandra<sup>7</sup>, Warren Winick-Ng<sup>12</sup>, Wenyan Li<sup>40</sup>, Xavier Darzacq<sup>10</sup>, Xianghong Jasmine Zhou<sup>40</sup>, Xinxian Deng<sup>11</sup>, Xiong Xiong<sup>29</sup>, Xiulan Yang<sup>41</sup>, Yang

Yang<sup>34</sup>, Yang Zhang<sup>34</sup>, Yi Kou<sup>3</sup>, Yi Zhou<sup>7</sup>, Yu Chen<sup>1</sup>, Yuchuan Wang<sup>34</sup>, Yunjiang Qiu<sup>17</sup>, ZhiJun Duan<sup>42</sup>, & Zhonghui Tang<sup>9</sup>

## **Nucleomics Tools**

Arjun Raj<sup>43</sup>, Erez Lieberman Aiden<sup>44</sup>, John Lis<sup>45</sup>, Mitchell Guttman<sup>46</sup>, Peter Fraser<sup>47, 22</sup>, Amos Tanay<sup>48</sup>, Gerd Blobel<sup>49</sup>, Hening Lin<sup>50</sup>, Jennifer Phillips-Cremins<sup>43</sup>, Rustem Ismagilov<sup>51</sup>, Warren Zipfel<sup>52</sup>, Abdullah Ozer<sup>45</sup>, Allison Cote<sup>43</sup>, Amy Chow<sup>46</sup>, Arina D. Omer<sup>44</sup>, Astra Hwang<sup>45</sup>, Carmel Dudley<sup>48</sup>, Caroline Bartman<sup>43</sup>, Charles Danko<sup>53</sup>, Csilla Varnai<sup>47</sup>, Juan Wang<sup>52</sup>, Judhajeet Ray<sup>45</sup>, Margaret Dunagin<sup>43</sup>, Mary Arrastia<sup>51</sup>, Mason Lai<sup>46</sup>, Mathew Curtis<sup>51</sup>, Max Kushner<sup>52</sup>, Melanie Pham<sup>44</sup>, Miao Wang<sup>50</sup>, Min Yang<sup>50</sup>, Neva C. Durand<sup>44</sup>, Noah Ollikainen<sup>46</sup>, Paul Munn<sup>53</sup>, Sarah Hsu<sup>43</sup>, Saurabh Bhardwaj<sup>43</sup>, Sofia Quinodoz<sup>46</sup>, Takashi Nagano<sup>47</sup>, Tauanne Amarante<sup>47</sup>, Yael Baran<sup>48</sup>, Yaniv Lubling<sup>48</sup>, & Zhong Wang<sup>53</sup>

## **Study of Nuclear Bodies and Compartments**

Clifford Brangwynne<sup>54</sup>, Larry Gerace<sup>55</sup>, Mitchell Guttman<sup>46</sup>, Paul Kaufman<sup>56</sup>, Stavros Lomvardas<sup>57</sup>, Job Dekker<sup>6</sup>, John Rinn<sup>58</sup>, Lewis Brown<sup>59</sup>, Mark Groudine<sup>60</sup>, Sonja Hess<sup>61</sup>, Thoru Pederson<sup>6</sup>, Ali Palla<sup>46</sup>, Alice Muimbey-Wahula<sup>57</sup>, Anastassia Vertii<sup>62</sup>, Annie Moradian<sup>61</sup>, Carolyn Larabell<sup>63</sup>, Cory Lindsay<sup>55</sup>, David Sanders<sup>54</sup>, David Scalzo<sup>60</sup>, Enrico Cannavò<sup>57</sup>, Gerry McDermott<sup>63</sup>, Hakan Ozadam<sup>6</sup>, Hanhui Ma<sup>6</sup>, James Moresco<sup>64</sup>, Joan Ritland<sup>60</sup>, John Yates<sup>64</sup>, Julie (Lihua) Zhu<sup>62</sup>, Katharine Roth<sup>60</sup>, Leah Tait<sup>60</sup>, Lian Zhu<sup>54</sup>, Magda Kordon<sup>62</sup>, Mark Le Gros<sup>63</sup>, Martin Escamilla<sup>57</sup>, Michael Sweredoski<sup>61</sup>, Phil Maas<sup>58</sup>, Rasim Barutcu<sup>58</sup>, Rupesh Amin<sup>60</sup>, Sabyasachi Baboo<sup>64</sup>, Salvador Martinez DeBartolome<sup>64</sup>, Tony Szempruch<sup>46</sup>, Ward Walkup<sup>46</sup>, Xiaoming Sun<sup>62</sup>, & Yongdae Shin<sup>54</sup>

## **Imaging Tools**

Clodagh O'Shea<sup>65</sup>, David Grunwald<sup>24</sup>, Jan Ellenberg<sup>66</sup>, Jan Liphardt<sup>67</sup>, Joerg Bewersdorf<sup>68</sup>, Kit Lam<sup>69</sup>, Long Cai<sup>51</sup>, Robert Singer<sup>70</sup>, Thomas Gregor<sup>71</sup>, David Baddeley<sup>68</sup>, Lei S. Qi<sup>72</sup>, Mark Ellisman<sup>73</sup>, Mike Levine<sup>71</sup>, R. Holland Cheng<sup>74</sup>, Xavier Darzacq<sup>10</sup>, Yoshihiro Izumiya<sup>69</sup>, Adrien Senecal<sup>70</sup>, Anders Hansen<sup>10</sup>, Andrew Barentine<sup>68</sup>, Andrew Spakowitz<sup>75</sup>, Anna-Karin Gustavsson<sup>76</sup>, Astou Tangara<sup>10</sup>, Bernd Rieger<sup>77</sup>, Bianca Nijmeijer<sup>66</sup>, Bomyi Lim<sup>71</sup>, Brian English<sup>70</sup>, Carl Barton<sup>78</sup>, Charles Kenworthy<sup>70</sup>, Christopher Carroll<sup>68</sup>, Daniela Boassa<sup>73</sup>, Ewan Birney<sup>78</sup>, Frank Chuang<sup>69</sup>, Guillaume Castillon<sup>73</sup>, Haifeng Wang<sup>67</sup>, Heinrich Grabmayr<sup>71</sup>, Hongtao Chen<sup>71</sup>, Horng Ou<sup>65</sup>, Jan Soroczyński<sup>65</sup>, Jeetayu Biswas<sup>70</sup>, Jie Yao<sup>68</sup>, Jingwen Yin<sup>65</sup>, Jonas Ries<sup>66</sup>, Jorge Bardales<sup>10</sup>, Julia Roberti<sup>66</sup>, Kenneth Zaret<sup>79</sup>, Kenny Chung<sup>68</sup>, Leslie Schmitt<sup>65</sup>, Lev Barinov<sup>71</sup>, Li-Chun Tu<sup>24</sup>, Li-Ling Yang<sup>66</sup>, Lin Tian<sup>69</sup>, Mason Mackey<sup>73</sup>, Matthias Haber<sup>73</sup>, Maximillian Huisman<sup>24</sup>, Michael Clark<sup>80</sup>, Michal Levo<sup>71</sup>, Mustafa Mir<sup>10</sup>, Nike Walther<sup>66</sup>, Oeyvind

Oedegaard<sup>66</sup>, Peng Guo<sup>70</sup>, Qinsi Zheng<sup>70</sup>, Rajarshi Ghosh<sup>67</sup>, Ranjan Ramachandra<sup>73</sup>, Robert Coleman<sup>70</sup>, Ruiwu Liu<sup>69</sup>, Ryan Walden<sup>65</sup>, Sebastien Phan<sup>73</sup>, Shi Quanming<sup>67</sup>, Sourav Ganguly<sup>10</sup>, Stephanie Alexander<sup>66</sup>, Steven Peltier<sup>73</sup>, Takashi Fukaya<sup>71</sup>, Thomas Deerinck<sup>73</sup>, Tomas Fitzgerald<sup>78</sup>, William Moerner<sup>76</sup>, Yandong Zhang<sup>51</sup>, Yiming Li<sup>66</sup>, Yodai Takei<sup>51</sup>, Yu Lin<sup>68</sup>, & Ziv Frankenstein<sup>65</sup>

### **Organizational Hub (4DN-OH)**

Sheng Zhong<sup>81</sup>, Bing Ren<sup>2</sup>, Shankar Subramaniam<sup>81</sup>, Shu Chien<sup>81</sup>, Haizi Zheng<sup>82</sup>, Kathia Zaleta Rivera<sup>82</sup>, Lucie Hebert<sup>82</sup>, Marcelo Rivas-Astroza<sup>82</sup>, Qiuyang Wu<sup>82</sup>, Riccardo Calandrelli<sup>82</sup>, Victor Leshyk<sup>82</sup>, Weizhong Chen<sup>82</sup>, Xiaoyi Cao<sup>82</sup>, & Zhangming Yan<sup>82</sup>

### **Data Coordination and Integration Center (4DN-DCIC)**

Ting Wang<sup>83</sup>, Peter Park<sup>84</sup>, Alexander Balashov<sup>84</sup>, Andy Schroeder<sup>84</sup>, Anton Goloborodko<sup>8</sup>, Burak Han Alver<sup>84</sup>, Carl Vitzthum<sup>84</sup>, Chris (Kee-Myoung) Nam<sup>84</sup>, Daofeng Li<sup>83</sup>, Deepak Purushotham<sup>83</sup>, Erica C. Pehrsson<sup>83</sup>, Feng Yue<sup>85</sup>, Fritz Lekschas<sup>86</sup>, Hanspeter Pfister<sup>86</sup>, Hendrik Strobel<sup>86</sup>, Hugo Brandão<sup>8</sup>, Hyo Sik Jang<sup>83</sup>, Jacob Lubner<sup>84</sup>, Jeewon (Grace) Hwang<sup>84</sup>, Jennifer Walsh<sup>84</sup>, Jeremy Johnson<sup>84</sup>, Johannes Nubler<sup>8</sup>, Koray Kirli<sup>84</sup>, Leonid Mirny<sup>8</sup>, Martin Falk<sup>8</sup>, Maxim Imakaev<sup>8</sup>, Mayank N.K. Choudhary<sup>83</sup>, Nezar Abdennur<sup>8</sup>, Nils Gehlenborg<sup>84</sup>, Peter Kerpedjiev<sup>84</sup>, Peter V Kharchenko<sup>84</sup>, Renee L. Sears<sup>83</sup>, Soo Lee<sup>84</sup>, Su Wang<sup>84</sup>, Tao Yang<sup>85</sup>, Tim Xiaoming Hu<sup>84</sup>, & Yiran Hou<sup>83</sup>

## **Affiliations:**

<sup>1</sup>Department of Cell and Developmental Biology, University of Illinois at Urbana-Champaign, Urbana, IL 61801, USA. <sup>2</sup>Ludwig Institute for Cancer Research, Department of Cellular and Molecular Medicine, Institute of Genomic Medicine, Moores Cancer Center, Institute of Engineering in Medicine, University of California, San Diego, La Jolla, CA 92093, USA. <sup>3</sup>Molecular and Computational Biology, Department of Biological Sciences, University of Southern California, Los Angeles, CA 90089, USA. <sup>4</sup>Department of Genome Sciences, University of Washington, Seattle, WA 98195, USA. <sup>5</sup>Howard Hughes Medical Institute, Seattle, WA 98195, USA. <sup>6</sup>Department of Biochemistry and Molecular Pharmacology, University of Massachusetts Medical School, Worcester, MA 01605, USA. <sup>7</sup>Department of Molecular Biology, Division of Biological Sciences, University of California, San Diego, La Jolla, CA 92093, USA. <sup>8</sup>Institute for Medical Engineering and Science, Massachusetts Institute of Technology, Cambridge, MA 02139, USA. <sup>9</sup>The Jackson Laboratory for Genomic Medicine, Farmington, CT 06030, USA. <sup>10</sup>Department of Molecular and Cell Biology, University of California, Berkeley, Berkeley, CA 94720, USA. <sup>11</sup>Department of Pathology, University of Washington, Seattle, WA 98195, USA. <sup>12</sup>Epigenetic Regulation and Chromatin Architecture, Berlin Institute for Medical Systems Biology, Max Delbrück Center for Molecular Medicine, 13125 Berlin-Buch, Germany. <sup>13</sup>Dipartimento di Fisica, Università di Napoli Federico II, and INFN Napoli, CNR-SPIN, Complesso Universitario di Monte Sant'Angelo, Naples, 80126, Italy. <sup>14</sup>Departments of Bioengineering and Therapeutic Sciences and Pharmaceutical Chemistry, University of California, San Francisco, San Francisco, CA 94158, USA. <sup>15</sup>Department of Molecular Biosciences, Northwestern University, Evanston, IL 60208, USA. <sup>16</sup>Division of Gene Regulation, Netherlands Cancer Institute, Amsterdam, 1066CX, the Netherlands. <sup>17</sup>Ludwig Institute for Cancer Research, Department of Cellular and Molecular Medicine, Institute of Genomic Medicine, Moores Cancer Center, University of California, San Diego, La Jolla, CA 92093, USA. <sup>18</sup>Laboratory of Mass Spectrometry and Gaseous Ion Chemistry, The Rockefeller University, New York, NY 10065, USA. <sup>19</sup>Institute for Stem Cell and Regenerative Medicine, University of Washington, Seattle, WA 98195, USA. <sup>20</sup>Department of Comparative Medicine, University of Washington, Seattle, WA 98195, USA. <sup>21</sup>Sequencing Technology Group, Joint Genome Institute, Lawrence Berkeley National Laboratory, Walnut Creek, CA 94598, USA. <sup>22</sup>Department of Biological Science, Florida State University, Tallahassee, FL 32306, USA. <sup>23</sup>Laboratory of Cellular and Structural Biology, The Rockefeller University, New York, NY 10065, USA. <sup>24</sup>RNA Therapeutics Institute, University of Massachusetts Medical School, Worcester, MA 01605, USA. <sup>25</sup>Centre of New Technologies, University of Warsaw, Warsaw, 02-097, Poland. <sup>26</sup>National Cancer Institute, NIH, Bethesda, MD 20892, USA. <sup>27</sup>Center for Infectious Disease Research, Seattle, WA 98109, USA. <sup>28</sup>High Throughput Imaging Facility (HiTIF), National Cancer Institute, NIH, Bethesda, MD 20892, USA. <sup>29</sup>Department of Chemistry, University of Illinois at Urbana-Champaign, Urbana, IL 61801, USA. <sup>30</sup>Department of Physics, Massachusetts Institute of Technology, Cambridge, MA 02139, USA. <sup>31</sup>Department of Quantitative Health Sciences, Lerner Research Institute, Cleveland Clinic Foundation, Cleveland, OH 44195, USA. <sup>32</sup>Paul G. Allen School of Computer Science and Engineering, Seattle, WA 98195, USA. <sup>33</sup>Peptide Biology Lab and the Helmsley Center for Genomic Medicine, Salk Institute for Biological Studies, 10010 North Torrey Pines Road, La Jolla, CA 92037, USA. <sup>34</sup>Computational Biology

Department, School of Computer Science, Carnegie Mellon University, Pittsburgh, PA 15213, USA. <sup>35</sup>Program in Molecular Medicine, University of Massachusetts Medical School, University of Massachusetts, Worcester, MA 01655, USA. <sup>36</sup>Departments of Pediatrics and Cellular and Molecular Medicine, Pediatric Diabetes Research Center, University of California San Diego, La Jolla, CA 92093, USA. <sup>37</sup>Department of Physics and Center for Theoretical Biological Physics, University of California, San Diego, La Jolla, CA 92093, USA. <sup>38</sup>The Broad Institute of MIT and Harvard, Cambridge, MA 02142, USA. <sup>39</sup>Genomics and Immunity, NIAMS, NIH, Bethesda, MD 20892, USA. <sup>40</sup>Department of Pathology and Laboratory Medicine, David Geffen School of Medicine, University of California, Los Angeles, CA 90095, USA. <sup>41</sup>Department of Pathology, Institute for Stem Cell and Regenerative Medicine, University of Washington, Seattle, WA 98195, USA. <sup>42</sup>Division of Hematology, University of Washington, Seattle, WA 98195, USA. <sup>43</sup>Department of Bioengineering, University of Pennsylvania, Philadelphia, PA 19104, USA. <sup>44</sup>The Center for Genome Architecture, Baylor College of Medicine, Houston, TX 77030, USA. <sup>45</sup>Department of Molecular Biology and Genetics, Cornell University, Ithaca, NY 14853, USA. <sup>46</sup>Division of Biology and Biological Engineering, California Institute of Technology, Pasadena, CA 91125, USA. <sup>47</sup>Nuclear Dynamics Programme, The Babraham Institute, Babraham Research Campus, Cambridge, CB22 3AT, UK. <sup>48</sup>Department of Computer Science and Applied Mathematics and Department of Biological Regulation, Weizmann Institute of Science, Rehovot, 76100, Israel. <sup>49</sup>Division of Hematology, The Children's Hospital of Philadelphia, Philadelphia, PA 19104, USA. <sup>50</sup>Department of Chemistry and Chemical Biology, Howard Hughes Medical Institute, Cornell University, Ithaca, NY 14853, USA. <sup>51</sup>Division of Chemistry and Chemical Engineering, California Institute of Technology, Pasadena, CA 91125, USA. <sup>52</sup>Department of Biomedical Engineering, Cornell University, Ithaca, NY 14853, USA. <sup>53</sup>Department of Biomedical Sciences, The Baker Institute for Animal Health, Cornell University, Ithaca, NY 14853, USA. <sup>54</sup>Department of Chemical and Biological Engineering, Princeton University, Princeton, NJ 08544, USA. <sup>55</sup>Department of Cell and Molecular Biology, The Scripps Research Institute, La Jolla, CA 92037, USA. <sup>56</sup>Department of Molecular, Cell and Cancer Biology, University of Massachusetts Medical School, Worcester, MA 01605, USA. <sup>57</sup>Department of Biochemistry and Molecular Biophysics, Mortimer B. Zuckerman Mind Brain and Behavior Institute, Columbia University, New York, NY 10027, USA. <sup>58</sup>Department of Stem Cell and Regenerative Biology, Harvard University, Cambridge, MA 02138, USA. <sup>59</sup>Department of Biological Sciences, Columbia University, New York, NY 10027, USA. <sup>60</sup>Fred Hutchinson Cancer Research Center, Seattle, WA 98109, USA. <sup>61</sup>Proteome Exploration Laboratory, Beckman Institute, California Institute of Technology, Pasadena, CA 91106, USA. <sup>62</sup>Department of Molecular, Cell and Cancer Biology, University of Massachusetts Medical School, Worcester, MA 01605, USA. <sup>63</sup>Department of Anatomy, University of California San Francisco, San Francisco, CA 94158, USA. <sup>64</sup>Department of Chemical Physiology, The Scripps Research Institute, La Jolla, CA 92073, USA. <sup>65</sup>Molecular and Cell Biology Laboratory, Salk Institute for Biological Studies, La Jolla, CA 92037, USA. <sup>66</sup>Cell Biology and Biophysics Unit, European Molecular Biology Laboratory, 69117 Heidelberg, Germany. <sup>67</sup>Department of Bioengineering, Stanford University, Stanford, CA 94305, USA. <sup>68</sup>Department of Cell Biology, School of Medicine, Yale University, New Haven, CT 06520, USA. <sup>69</sup>Department of Biochemistry and Molecular Medicine, University of California Davis, Sacramento, CA 95616, USA. <sup>70</sup>Department of Anatomy and Structural Biology,

Albert Einstein College of Medicine, Bronx, NY 10461, USA. <sup>71</sup>Lewis-Sigler Institute for Integrative Genomics, Princeton University, Princeton, NJ 08540, USA. <sup>72</sup>Department of Bioengineering, Department of Chemical and Systems Biology, ChEM-H, Stanford University, CA 94305, USA. <sup>73</sup>Center for Research in Biological Systems, National Center for Microscopy and Imaging Research, University of California, San Diego, La Jolla, CA 92093, USA. <sup>74</sup>Department of Molecular and Cellular Biology, University of California Davis, Sacramento, CA 95616, USA. <sup>75</sup>Department of Chemical Engineering, Stanford University, Stanford, CA 94305, USA. <sup>76</sup>Department of Chemistry, Stanford University, Stanford, CA 94305, USA. <sup>77</sup>Quantitative Imaging Group, Delft University of Technology, Delft, 2600GA, The Netherlands. <sup>78</sup>European Molecular Biology Laboratory, European Bioinformatics Institute (EMBL-EBI), Hinxton CB10 1SD, UK. <sup>79</sup>Department of Cell and Developmental Biology, University of Pennsylvania Perelman School of Medicine, Philadelphia, PA 19104, USA. <sup>80</sup>Institute for Stem Cell Biology and Regenerative Medicine, Stanford University School of Medicine, Stanford, CA 94305, USA. <sup>81</sup>Department of Bioengineering, Institute of Engineering in Medicine, University of California, San Diego, La Jolla, CA 92093, USA. <sup>82</sup>Department of Bioengineering, University of California, San Diego, La Jolla, CA 92093, USA. <sup>83</sup>Department of Genetics, The Edison Family Center for Genome Sciences and Systems Biology, Washington University School of Medicine, St. Louis, MO 63108, USA. <sup>84</sup>Department of Biomedical Informatics, Harvard Medical School, Boston, MA 02115, USA. <sup>85</sup>Department of Biochemistry and Molecular Biology, College of Medicine, The Pennsylvania State University, Hershey, PA 17033, USA. <sup>86</sup>School of Engineering and Applied Sciences, Harvard University, Cambridge, MA 02138, USA.
